# Supplementary material for: Consumer Financial Knowledge and Cashless Payment Behavior for Sustainable Development in Poland
Source: MDPI journal article supplement (doi:10.3390/su13116401), 2021-06-04
Supplement: s1 [file s1]

Archive with 1 entries (1 files):
- sustainability-1197405-supplementary.pdf
